# Supplementary material for: [Cr(pincer2−)]2 as an electron shuttle for reductively promoted hydrazine disproportionation
Source: Royal Society of Chemistry journal article supplement (doi:10.1039/c9dt02300c), 2019-01-01
Supplement: c9dt02300c1.pdf [file c9dt02300c1.pdf]

Supplemental Information

**[CrL]<sub>2</sub> as an Electron Shuttle for Reductively Promoted Hydrazine Disproportionation**

Nicholas S. Labrum, and Kenneth G. Caulton\*

Department of Chemistry, Indiana University, Bloomington, Indiana

**Table of Contents**

|                                                                                                                                                                                                                                                                                                   |   |
|---------------------------------------------------------------------------------------------------------------------------------------------------------------------------------------------------------------------------------------------------------------------------------------------------|---|
| Experimental .....                                                                                                                                                                                                                                                                                | 2 |
| General Methods.....                                                                                                                                                                                                                                                                              | 2 |
| [Cr <sub>2</sub> L <sub>2</sub> (PhNH <sub>2</sub> ) <sub>2</sub> (PhHNN)]. .....                                                                                                                                                                                                                 | 2 |
| NH <sub>3</sub> and benzene assays.....                                                                                                                                                                                                                                                           | 2 |
| NMR Spectra .....                                                                                                                                                                                                                                                                                 | 3 |
| Figure S1. <sup>1</sup> H NMR spectrum of [CrL] <sub>2</sub> and PhNHNH <sub>2</sub> in a 1:4 mole ratio in THF <sub>d8</sub> .....                                                                                                                                                               | 3 |
| Figure S2. <sup>1</sup> H NMR spectrum of volatile products from [Cr <sub>2</sub> L <sub>2</sub> (PhNH <sub>2</sub> ) <sub>2</sub> (PhHNN)] synthesis, showing NH <sub>4</sub> <sup>+</sup> triplet, and benzene singlet (7.35 ppm); BArF <sub>24</sub> signals at 7.62 ppm. ....                 | 4 |
| Figure S3. <sup>1</sup> H NMR spectrum of [CrL] <sub>2</sub> and PhNHNH <sub>2</sub> in a 1:1.5 mole ratio in THF <sub>d8</sub> .....                                                                                                                                                             | 4 |
| Figure S4. <sup>1</sup> H NMR spectrum of volatile products from [Cr <sub>2</sub> L <sub>2</sub> (PhNH <sub>2</sub> ) <sub>2</sub> (PhHNN)] (1[CrL] <sub>2</sub> :1.5PhNHNH <sub>2</sub> mole ratio) synthesis, showing NH <sub>4</sub> <sup>+</sup> triplet, and benzene singlet (7.33 ppm)..... | 5 |
| Figure S5. <sup>1</sup> H NMR spectrum of [CrL] <sub>2</sub> and PhNHNH <sub>2</sub> in a 1:2 mole ratio in THF <sub>d8</sub> .....                                                                                                                                                               | 5 |
| Figure S6. <sup>1</sup> H NMR spectrum of volatile products from [Cr <sub>2</sub> L <sub>2</sub> (PhNH <sub>2</sub> ) <sub>2</sub> (PhHNN)] (1[CrL] <sub>2</sub> :2PhNHNH <sub>2</sub> mole ratio) synthesis, showing NH <sub>4</sub> <sup>+</sup> triplet, and benzene singlet (7.31 ppm).....   | 6 |
| Crystallographic Information.....                                                                                                                                                                                                                                                                 | 6 |
| MSC#S18013 [Cr <sub>2</sub> L <sub>2</sub> (PhNH <sub>2</sub> ) <sub>2</sub> (PhHNN)] Labrum.....                                                                                                                                                                                                 | 6 |
| References.....                                                                                                                                                                                                                                                                                   | 8 |

## Experimental

**General Methods.** All manipulations were carried out under an atmosphere of argon using standard Schlenk techniques or in a glovebox under ultra-high purity nitrogen. Solvents were purchased from commercial sources, purified using Innovative Technology SPS-400 PureSolv solvent system or by distilling from conventional drying agents and degassed by the freeze-pump-thaw method thrice prior to use. Glassware was oven-dried at 150 °C overnight and flame dried prior to use. THF was stored over activated 4 Å molecular sieves and sodium metal pieces. Deuterated solvents, THF<sub>d8</sub>, DMSO-*d*<sub>6</sub> were dried over CaH<sub>2</sub>, subjected to three freeze-pump-thaw cycles, distilled and stored over 4 Å molecular sieves in the glovebox prior to use. All starting reagents were commercially available and used without further purification. All <sup>1</sup>H NMR spectra were collected at 25 °C on a Varian Inova-400 spectrometer operating at 400.11 MHz. <sup>1</sup>H NMR spectra of paramagnetic compounds were collected with 0.1 s relaxation delay and at least 1024 transients per spectra. Spectra were referenced to the residual respective protio impurities and solvent employed.

**[Cr<sub>2</sub>L<sub>2</sub>(PhNH<sub>2</sub>)<sub>2</sub>(PhHNN)].** A portion of [CrL]<sub>2</sub> (25.0 mg, 0.033 mmol) was dissolved in THF<sub>d8</sub> and added to a Teflon-valve NMR tube via pipette. Phenylhydrazine (6.6 μL, 0.067 mmol) was added to the NMR tube via syringe. In time of mixing the reagents the color changed to a dark brown-yellow. The NMR tube was tumbled for 1 hour before collecting <sup>1</sup>H NMR spectra. **<sup>1</sup>H NMR (400 MHz, 25 °C, THF<sub>d8</sub>):** δ 31.7, 21.4, 18.5, 16.7, 8.2, 7.3, 7.0, 6.9, 6.7, 6.5, 5.9, 4.3, 3.0 (9H, tBu), 2.7 (9H, tBu), 2.5 (9H, tBu), 2.2 (9H, tBu), -7.6, -11.2, -18.2, -30.0, -35.9, -38.6, -43.2, -45.4, -71.5, -73.5, -103.9 ppm. **ESI-MS (+):** m/z, calc. for C<sub>50</sub>H<sub>61</sub>Cr<sub>2</sub>N<sub>14</sub> = 961.4, found = 961.4, [Cr<sub>2</sub>(HL)(L)(NHNHPh)<sub>2</sub>]; m/z calc. for C<sub>44</sub>H<sub>55</sub>Cr<sub>2</sub>N<sub>12</sub> = 855.4, found 855.3, [Cr<sub>2</sub>(HL)<sub>2</sub>(NHNHPh)]; m/z calc. for C<sub>44</sub>H<sub>53</sub>Cr<sub>2</sub>N<sub>12</sub> = 853.3, found = 853.3, [Cr<sub>2</sub>(L)<sub>2</sub>(NHNHPh)]; m/z calc. for C<sub>38</sub>H<sub>53</sub>Cr<sub>2</sub>N<sub>12</sub> = 781.3, found 781.3, [Cr<sub>2</sub>(HL)(L)(NH<sub>3</sub>)<sub>2</sub>].

The net conversion shown in eq 3 consumes two electrons, hence is not yet a closed cycle. We sought to close the synthetic cycle by the addition of H<sub>2</sub> or 9,10-dihydroanthracene to [Cr<sub>2</sub>L<sub>2</sub>(PhNH<sub>2</sub>)<sub>2</sub>(PhHNN)]. Both reagents failed to effect subsequent transformation in THF solvent at room temperature or up to 60 °C.

**NH<sub>3</sub> and benzene assays.** The volatile material from the reaction of [CrL]<sub>2</sub> and PhNHNH<sub>2</sub> in a 1:4 mole ratio was vacuum transferred from a JY NMR tube (**A**) to another JY NMR tube (**B**) containing 1 mL of a 2mM NaBArF<sub>24</sub> solution in DMSO-*d*<sub>6</sub> and 25 μL of 2 M HCl in Et<sub>2</sub>O by vacuum transfer. JY NMR tube **B** was tumbled for 30 minutes prior to collecting <sup>1</sup>H NMR spectra. A T<sub>1</sub> experiment was conducted to ensure the relaxing delay (10 sec) was appropriate for quantifying the NMR yield of NH<sub>4</sub>Cl. Assay for NH<sub>3</sub> and benzene from the reaction of [CrL]<sub>2</sub> and PhNHNH<sub>2</sub> in a 1:1.5 and 1:2 mole ratio was conducted in an analogous manner without the addition of NaBArF<sub>24</sub> as an internal standard.

# NMR Spectra

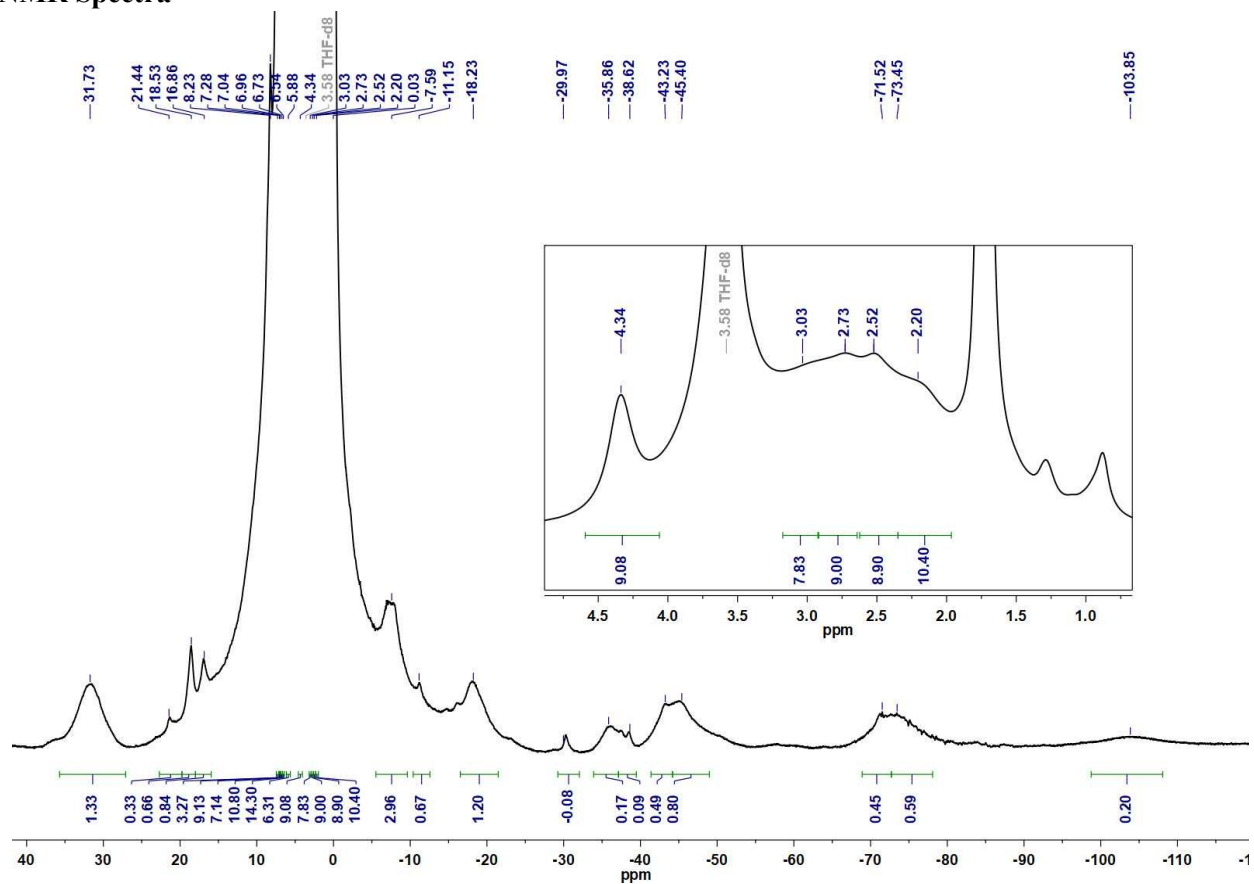

**Figure S1.**  $^1\text{H}$  NMR spectrum of reaction of  $[\text{CrL}]_2$  and  $\text{PhNHNH}_2$  in a 1:4 mole ratio in  $\text{THF}_{\text{d}8}$ .

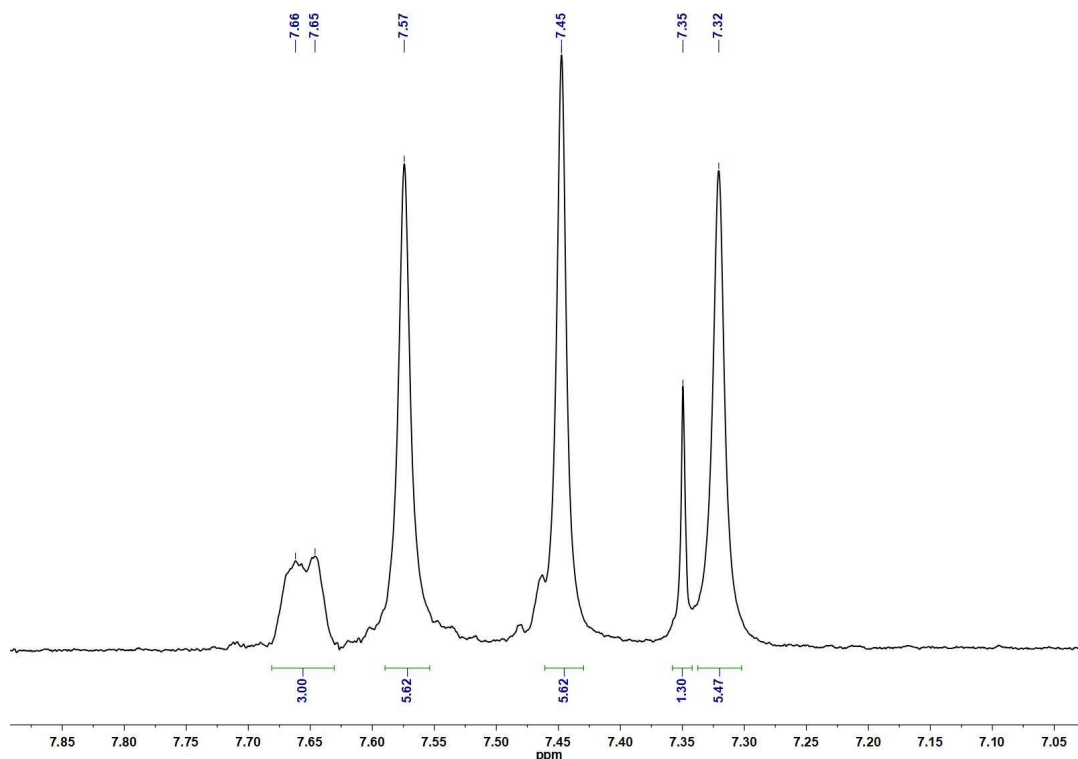

**Figure S2.**  $^1\text{H}$  NMR spectrum of volatile products from  $[\text{Cr}_2\text{L}_2(\text{PhNH}_2)_2(\text{PhHNN})]$  synthesis, showing  $\text{NH}_4^+$  triplet ( $J_{\text{N-H}} = 50.7$  Hz), and benzene singlet (7.35 ppm); BARF<sub>24</sub> signals at 7.62 ppm.

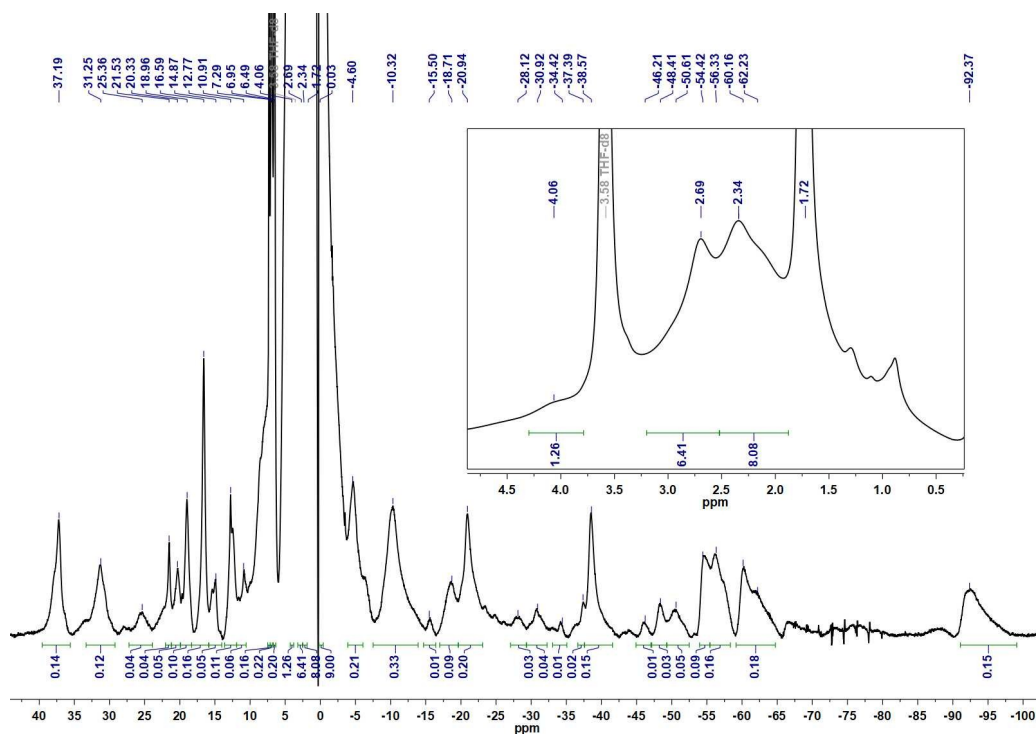

**Figure S3.**  $^1\text{H}$  NMR spectrum of reaction of  $[\text{CrL}]_2$  and  $\text{PhNHNH}_2$  in a 1:1.5 mole ratio in  $\text{THF-d}_8$ .

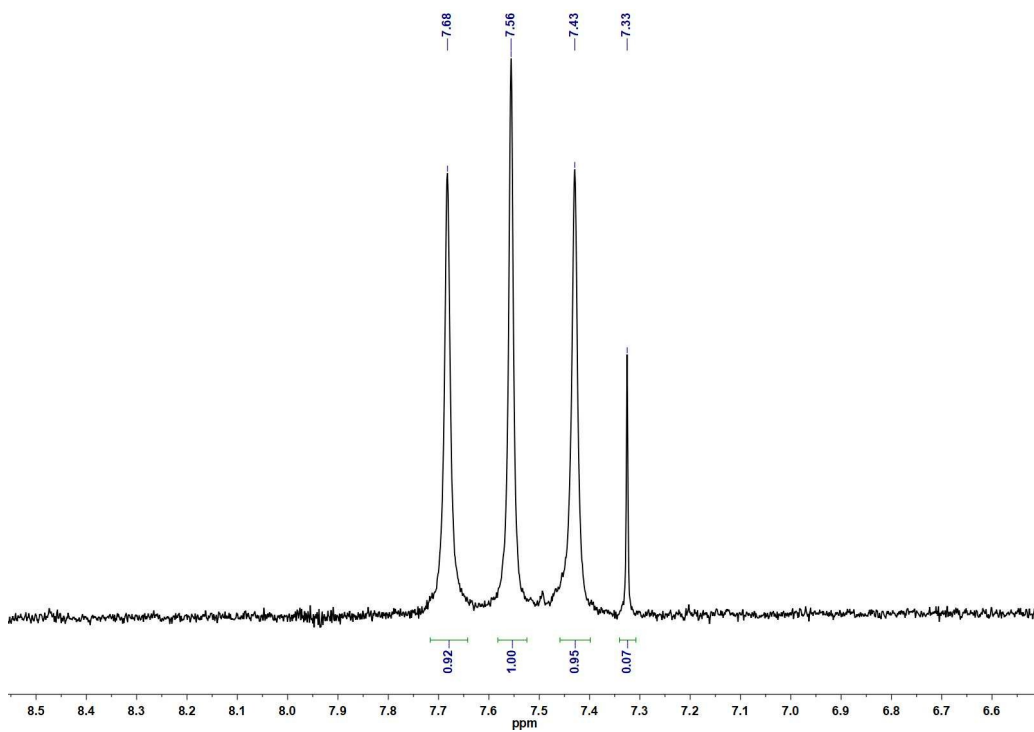

**Figure S4.**  $^1\text{H}$  NMR spectrum of volatile products from  $[\text{Cr}_2\text{L}_2(\text{PhNH}_2)_2(\text{PhHNN})]$  ( $1[\text{CrL}]_2:1.5\text{PhNHNH}_2$  mole ratio) synthesis, showing  $\text{NH}_4^+$  triplet, and benzene singlet (7.33 ppm).

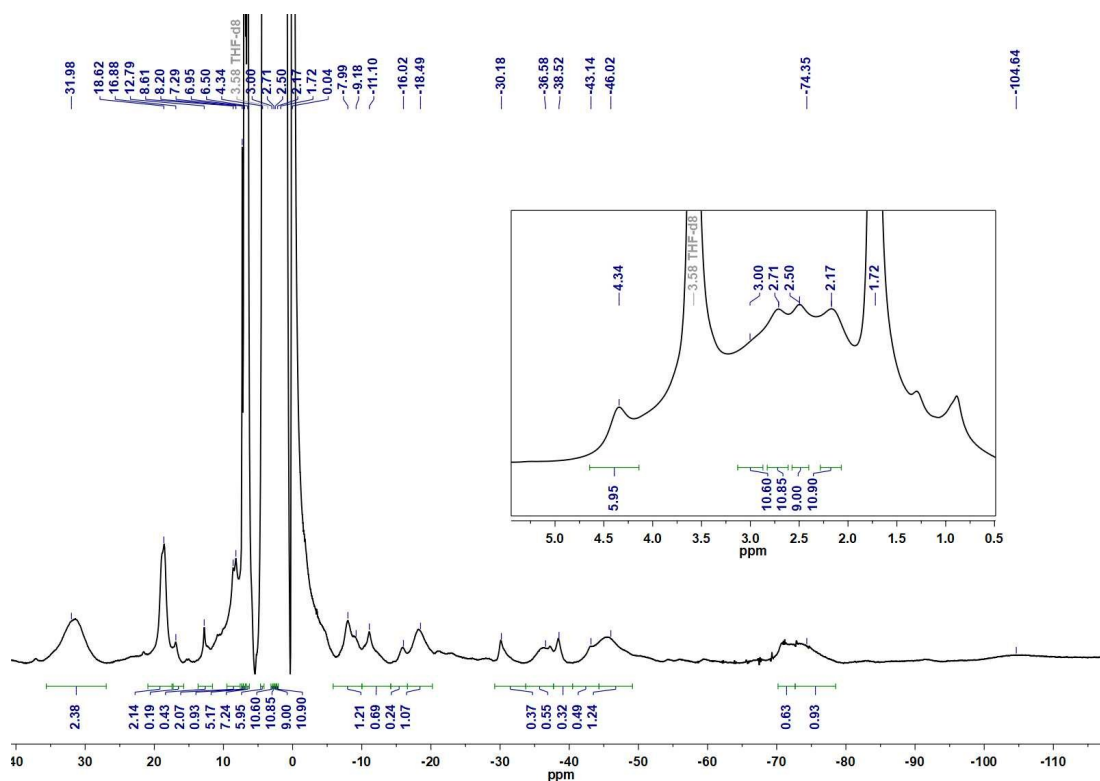

**Figure S5.**  $^1\text{H}$  NMR spectrum of  $[\text{CrL}_2]$  and  $\text{PhNHNH}_2$  in a 1:2 mole ratio in  $\text{THF}_{\text{d}8}$ .

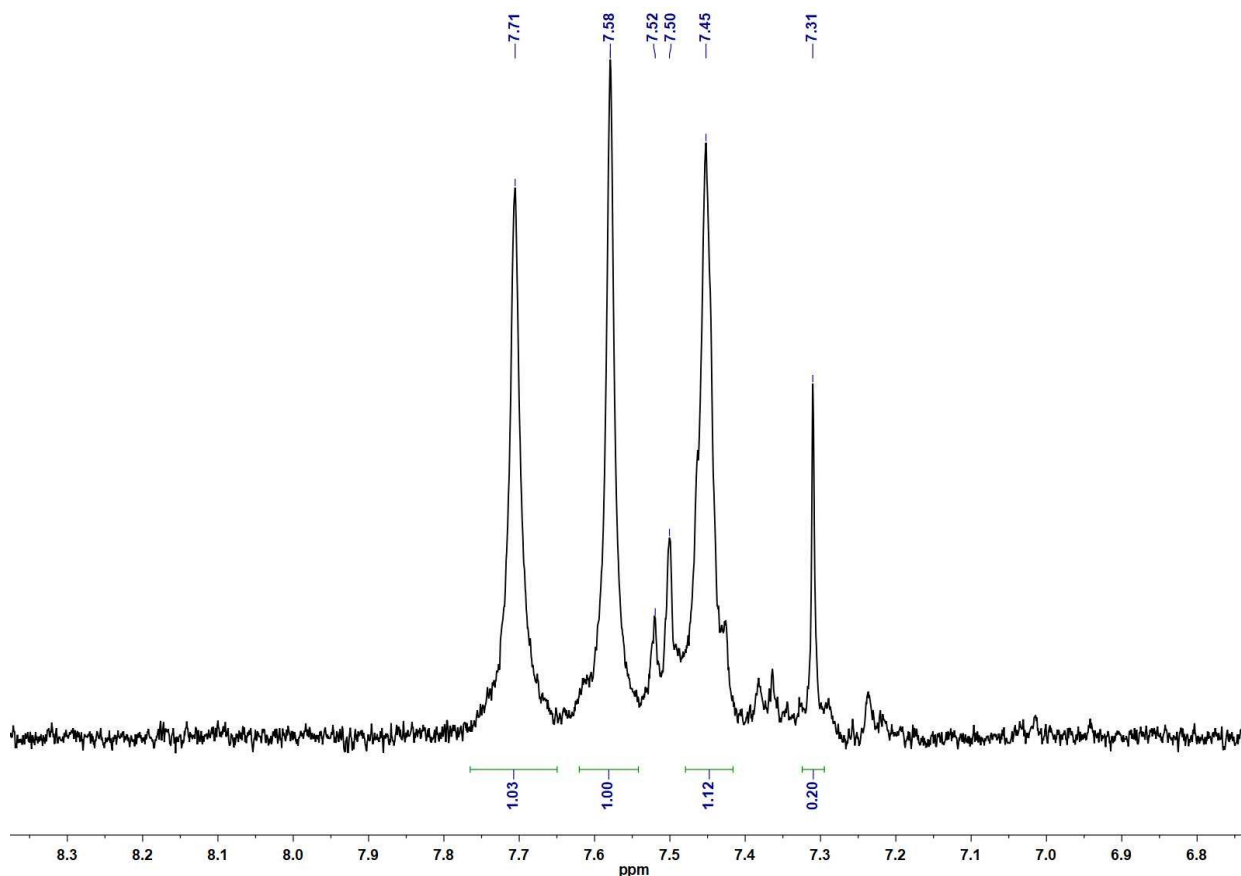

**Figure S6.**  $^1\text{H}$  NMR spectrum of volatile products from  $[\text{Cr}_2\text{L}_2(\text{PhNH}_2)_2(\text{PhHNN})]$  ( $1[\text{CrL}]_2:2\text{PhNHNH}_2$  mole ratio) synthesis, showing  $\text{NH}_4^+$  triplet, and benzene singlet (7.31 ppm).

### Crystallographic Information

**MSC#S18013  $[\text{Cr}_2\text{L}_2(\text{PhNH}_2)_2(\text{PhHNN})]$  Labrum**  
CCDC 1906015

A brown crystal (approximate dimensions  $0.070 \times 0.040 \times 0.020 \text{ mm}^3$ ) was placed on the tip of a glass capillary and mounted on a Huber three-circle diffractometer and measured at 100 K. investigated with synchrotron radiation at the ChemMatCARS beamline, Advanced Photon Source, Argonne National Laboratory, Chicago, utilizing the SCrAPS program (<http://www.iumsc.indiana.edu/projects/SCrAPS/index.html>).

### Data collection

The data collection was carried out using synchrotron radiation ( $\lambda = 0.41328$ , silicon 111 and 311 monochromators, two mirrors to exclude higher harmonics) with a frame time of 3.0 seconds and a detector distance of 5.0 cm. A randomly oriented region of reciprocal space was surveyed to the extent of hemispheres. Two major sections of frames were collected with  $0.50^\circ$  steps in  $\phi$  and a detector position of  $0^\circ$  in  $2\theta$ . Data to a resolution of  $0.84 \text{ \AA}$  were considered in the reduction. Final cell constants were calculated from the xyz centroids of 6128 strong reflections

from the actual data collection after integration (SAINT).<sup>1</sup> The intensity data were corrected for absorption (SADABS).<sup>2</sup> Refer to Table S1 for additional crystal and refinement information.

### Structure solution and refinement

The space group  $P2_1/n$  was determined based on intensity statistics and systematic absences. The structure was solved using Superflip<sup>3</sup> and refined (full-matrix-least squares) using the Oxford University Crystals for Windows system.<sup>4</sup> The result of the solution provided most non-hydrogen atoms from the E-map. Full-matrix least squares / difference Fourier cycles were performed, which located the remaining non-hydrogen atoms. All non-hydrogen atoms were refined with anisotropic displacement parameters. The hydrogen atoms were placed in ideal positions and refined as riding. The final full matrix least squares refinement converged to  $R1 = 0.0854$  and  $wR2 = 0.2568$  ( $F^2$ , all data).

### Structure description

The structure was found as an  $[CrL]_2$  dimer with a bridging phenyldiazene moiety. The coordination sphere about Cr2 also contains two aniline ligands, in addition to the pincer ligand. The pincer ligands are deprotonated and hydrogen bond to the aniline moieties.

**Table S1.** Crystal data and structure refinement for S18013.

|                                 |                                                                                |                               |
|---------------------------------|--------------------------------------------------------------------------------|-------------------------------|
| Empirical formula               | C <sub>65</sub> H <sub>86</sub> Cr <sub>2</sub> N <sub>14</sub> O <sub>1</sub> |                               |
| Formula weight                  | 1183.48                                                                        |                               |
| Crystal color, shape, size      | brown block fragment, 0.070 x 0.040 x 0.020 mm <sup>3</sup>                    |                               |
| Temperature                     | 100 K                                                                          |                               |
| Wavelength                      | 0.41328 Å                                                                      |                               |
| Crystal system, space group     | Monoclinic, $P2_1/n$                                                           |                               |
| Unit cell dimensions            | $a = 15.7688(17)$ Å                                                            | $\alpha = 90^\circ$ .         |
|                                 | $b = 15.4878(16)$ Å                                                            | $\beta = 99.1594(17)^\circ$ . |
|                                 | $c = 26.500(3)$ Å                                                              | $\gamma = 90^\circ$ .         |
| Volume                          | 6389.3(12) Å <sup>3</sup>                                                      |                               |
| Z                               | 4                                                                              |                               |
| Density (calculated)            | 1.230 Mg/m <sup>3</sup>                                                        |                               |
| Absorption coefficient          | 0.100 mm <sup>-1</sup>                                                         |                               |
| F(000)                          | 2520                                                                           |                               |
| Data collection                 |                                                                                |                               |
| Diffractometer                  | Huber three-circle                                                             |                               |
| Theta range for data collection | 0.905 to 14.274°.                                                              |                               |
| Index ranges                    | -18 ≤ h ≤ 18, -18 ≤ k ≤ 18, -31 ≤ l ≤ 31                                       |                               |
| Reflections collected           | 129860                                                                         |                               |
| Independent reflections         | 11249 [R(int) = 0.168]                                                         |                               |
| Observed Reflections            | 7007                                                                           |                               |

|                                   |                                                                                                                                                           |
|-----------------------------------|-----------------------------------------------------------------------------------------------------------------------------------------------------------|
| Completeness to theta = 12.990°   | 99.2 %                                                                                                                                                    |
| Solution and Refinement           |                                                                                                                                                           |
| Absorption correction             | Semi-empirical from equivalents                                                                                                                           |
| Max. and min. transmission        | 0.99 and 0.98                                                                                                                                             |
| Solution                          | Direct methods                                                                                                                                            |
| Refinement method                 | Full-matrix least-squares on F <sup>2</sup>                                                                                                               |
| Weighting scheme                  | w = [ $\sigma^2 F_o^2 + AP^2 + BP$ ] <sup>-1</sup> , with<br>P = (F <sub>o</sub> <sup>2</sup> + 2 F <sub>c</sub> <sup>2</sup> )/3, A = 0.124 , B = 15.090 |
| Data / restraints / parameters    | 11206 / 78 / 734                                                                                                                                          |
| Goodness-of-fit on F <sup>2</sup> | 1.0097                                                                                                                                                    |
| Final R indices [I>2sigma(I)]     | R1 = 0.0854, wR2 = 0.2161                                                                                                                                 |
| R indices (all data)              | R1 = 0.1326, wR2 = 0.2568                                                                                                                                 |
| Largest diff. peak and hole       | 1.41 and -0.86 e.Å <sup>-3</sup>                                                                                                                          |

## References

1. Bruker Analytical X-Ray Systems, Madison, WI, **current version**.
2. R. Blessing, *Acta Crystallographica Section A*, 1995, **51**, 33-38.
3. L. Palatinus and G. Chapuis, *J. Appl. Crystallogr.*, 2007, **40**, 786-790.
4. P. W. Betteridge, J. R. Carruthers, R. I. Cooper, K. Prout and D. J. Watkin, *J. Appl. Crystallogr.*, 2003, **36**, 1487.
